# Supplementary material for: Dual-emissive EY/UiO-66-NH2 as a ratiometric probe for turn-on sensing and cell imaging of hypochlorite
Source: Royal Society of Chemistry journal article supplement (doi:10.1039/d2an00944g), 2022-01-01
Supplement: d2an00944g1.pdf [file d2an00944g1.pdf]

## Supplementary Material

### Contents

1. Generation of ROS
2. Figure S1. FTIR spectra of EY/UiO-66-NH<sub>2</sub>.
3. Figure S2. UV-vis absorption spectra and the corresponding linear fitting of (A) NH<sub>2</sub>-H<sub>2</sub>BDC molecule absorbance at 366 nm, (B) EY molecule absorbance at 523 nm and (C) UV-vis spectra after digestion procedures for EY/UiO-66-NH<sub>2</sub> (5 mg/mL) with NaOH/DMF(v:v=1:1).
4. Table S1. The feed ratio and actual doping content of EY/UiO-66-NH<sub>2</sub>
5. Figure S3. (A) Effect of pH and (B) contact time to the fluorescent intensity ratio  $I_{533\text{nm}}/I_{432\text{nm}}$  of EY/UiO-66-NH<sub>2</sub> suspension.
6. Figure S4. PXRD patterns of EY/UiO-66-NH<sub>2</sub> in PBS (pH=7.4, 10 mM) for different time.
7. Figure S5. Fluorescence intensity ratio  $I_{533\text{nm}}/I_{432\text{nm}}$  of EY/UiO-66-NH<sub>2</sub> after adding different foreign substances in the absence (black) and presence (red) of 10<sup>-4</sup> mol/L ClO<sup>-</sup>.
8. Figure S6. (A) PXRD images and (B) IR spectra and (C) UV/vis spectra and (D) time-resolved fluorescence decays of EY/UiO-66-NH<sub>2</sub> in the presence and absence of 10<sup>-4</sup> mol/L ClO<sup>-</sup>.
9. Figure S7. (A) Fluorescence response of EY (50 µg/mL) toward various ions (10 mM) and (B) toward various ROS species (50 µM (ClO<sup>-</sup>, <sup>1</sup>O<sub>2</sub>, OH<sup>·</sup>, ONOO<sup>-</sup>), 50 mM H<sub>2</sub>O<sub>2</sub>, 5 mM O<sub>2</sub><sup>-·</sup>). (C) Fluorescence response of EY toward various amount of ClO<sup>-</sup>.  $\lambda_{\text{ex}} = 467$  nm, slit width, 1.5 nm/3 nm.
10. Figure S8. Viability of L02, Hela and Raw264.7 cells after incubated with various concentrations of EY/UiO-66-NH<sub>2</sub> after 24 h.
11. Figure S9. Confocal fluorescence imaging of exogenous ClO<sup>-</sup> in L02 cells. (A) Bioimaging of

L02 cells without any treatment; (B) Bioimaging of L02 cells incubated with EY/UiO-66-NH<sub>2</sub>

(50 µg/mL) for 5 hours at 37°C and (C) further incubated with 100 µM NaClO.

12. Table S2. Comparison of different fluorescence methods for hypochlorite sensing

13. Reference

## Generation of ROS

ROS species were obtained according to previous work<sup>1,2</sup>.  $\text{ClO}^-$  was diluted from NaClO storage solution.  $\cdot\text{OH}$  was prepared by Fenton reaction of  $\text{Fe}^{2+}$  and  $\text{H}_2\text{O}_2$  and  $\cdot\text{OH}$  has the same concentration as  $\text{Fe}^{2+}$ .  $\text{H}_2\text{O}_2$  was acquired from 30% hydrogen peroxide.  $\text{O}_2^{\cdot-}$  was prepared from pyrogallol autoxidation assay and  $^1\text{O}_2$  was obtained from the reaction between NaClO and  $\text{H}_2\text{O}_2$ . To prepare ONOO-, sodium sodium nitrite (0.6 M) and hydrogen peroxide (0.7 M) was mixed and the mixture was then acidified with hydrochloric acid solution (0.6 M), following by sodium hydroxide solution (1.5 M) to make the solution alkaline.

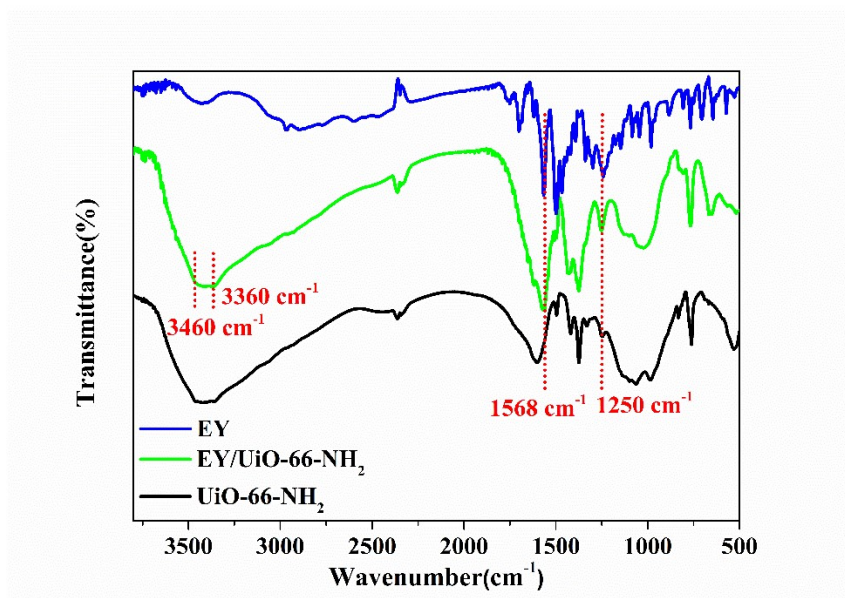

**Figure S1.** FTIR spectra of EY/Uio-66-NH<sub>2</sub>.

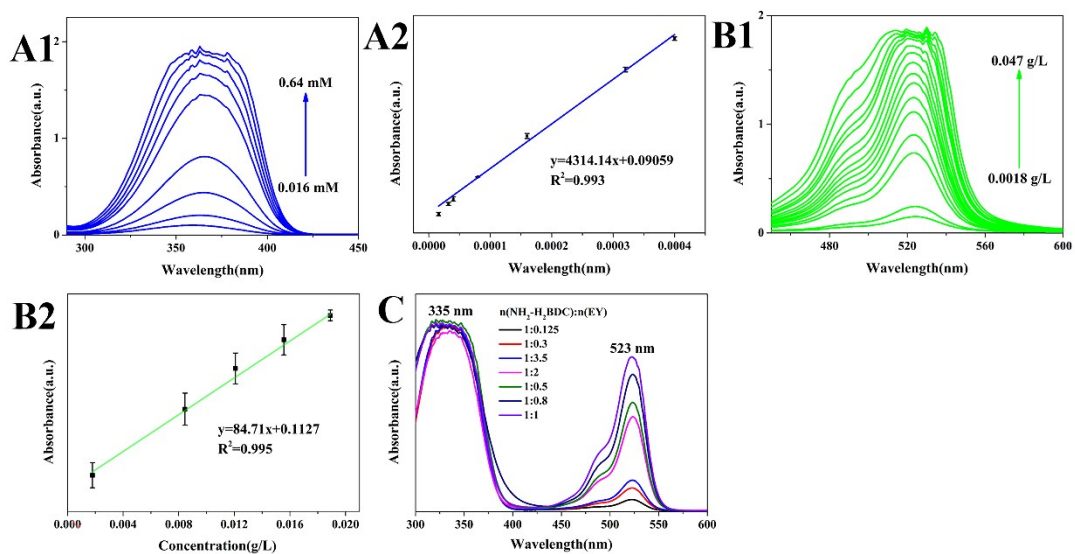

**Figure S2.** UV-vis absorption spectra and the corresponding linear fitting of (A)  $\text{NH}_2\text{-H}_2\text{BDC}$  molecule absorbance at 366 nm, (B) EY molecule absorbance at 523 nm and (C) UV-vis spectra after digestion procedures for EY/ $\text{UiO-66-NH}_2$  (5 mg/mL) with NaOH/DMF(v:v=1:1).

**Table S1** The feed ratio and actual doping content of EY/ $\text{UiO-66-NH}_2$

| The feed ratio of EY/ $\text{UiO-66-NH}_2$ | Absorbance after digestion and dilution | The actual doping content of EY/ $\text{UiO-66-NH}_2$ |
|--------------------------------------------|-----------------------------------------|-------------------------------------------------------|
| 1:0.125                                    | 0.1295                                  | 1:0.0013                                              |
| 1:0.3                                      | 0.2515                                  | 1:0.011                                               |
| 1:0.5                                      | 1.1335                                  | 1:0.079                                               |
| 1:0.8                                      | 1.4429                                  | 1:0.068                                               |
| 1:1                                        | 1.6061                                  | 1:0.12                                                |
| 1:2                                        | 0.9857                                  | 1:0.1                                                 |
| 1:3.5                                      | 0.3324                                  | 1:0.017                                               |

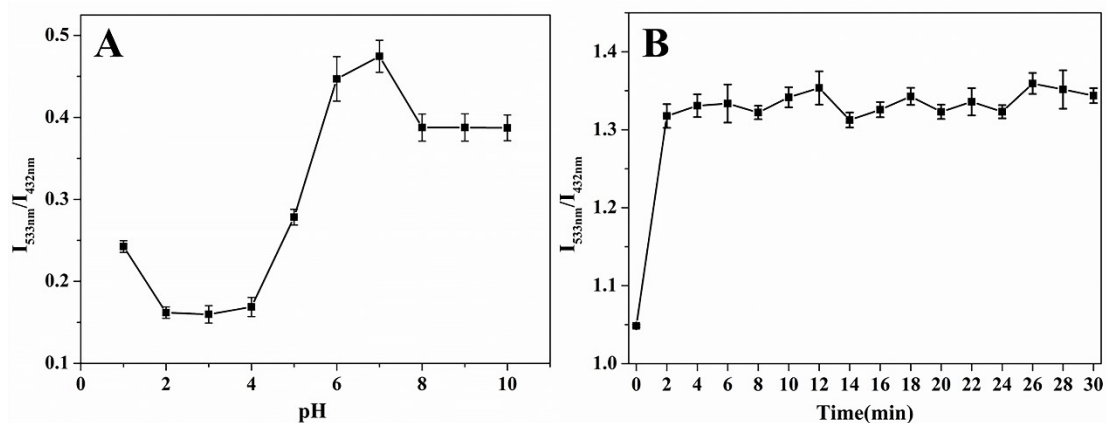

**Figure S3.** (A) Effect of pH and (B) contact time to the fluorescent intensity ratio  $I_{533\text{nm}}/I_{432\text{nm}}$  of EY/UiO-66-NH<sub>2</sub> suspension.

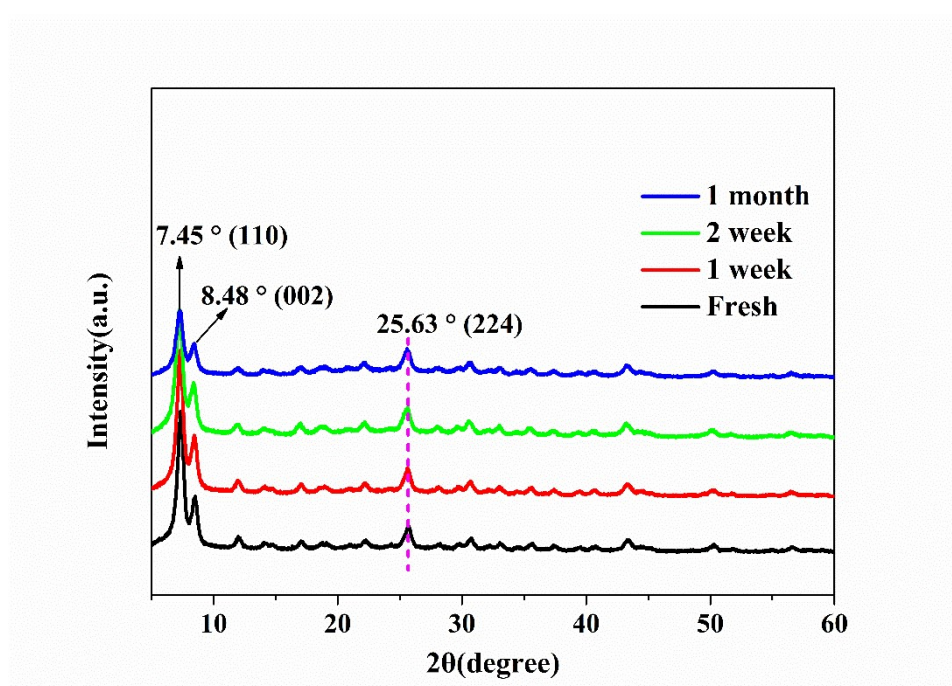

**Figure S4.** PXRD patterns of EY/UiO-66-NH<sub>2</sub> in PBS (pH=7.4, 10 mM) for different time.

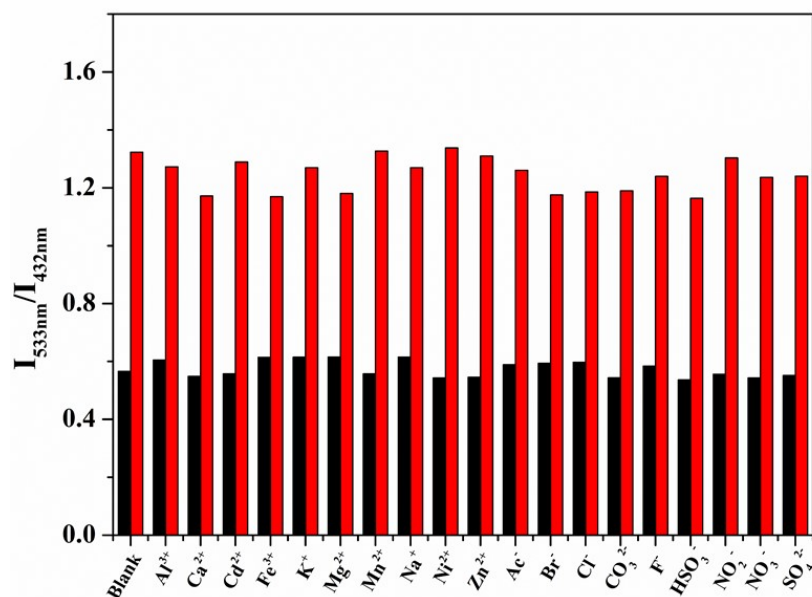

**Figure S5.** Fluorescence intensity ratio  $I_{533\text{nm}}/I_{432\text{nm}}$  of EY/Uio-66-NH<sub>2</sub> after adding different foreign substances in the absence (black) and presence (red) of  $10^{-4}$  mol/L ClO<sup>-</sup>.

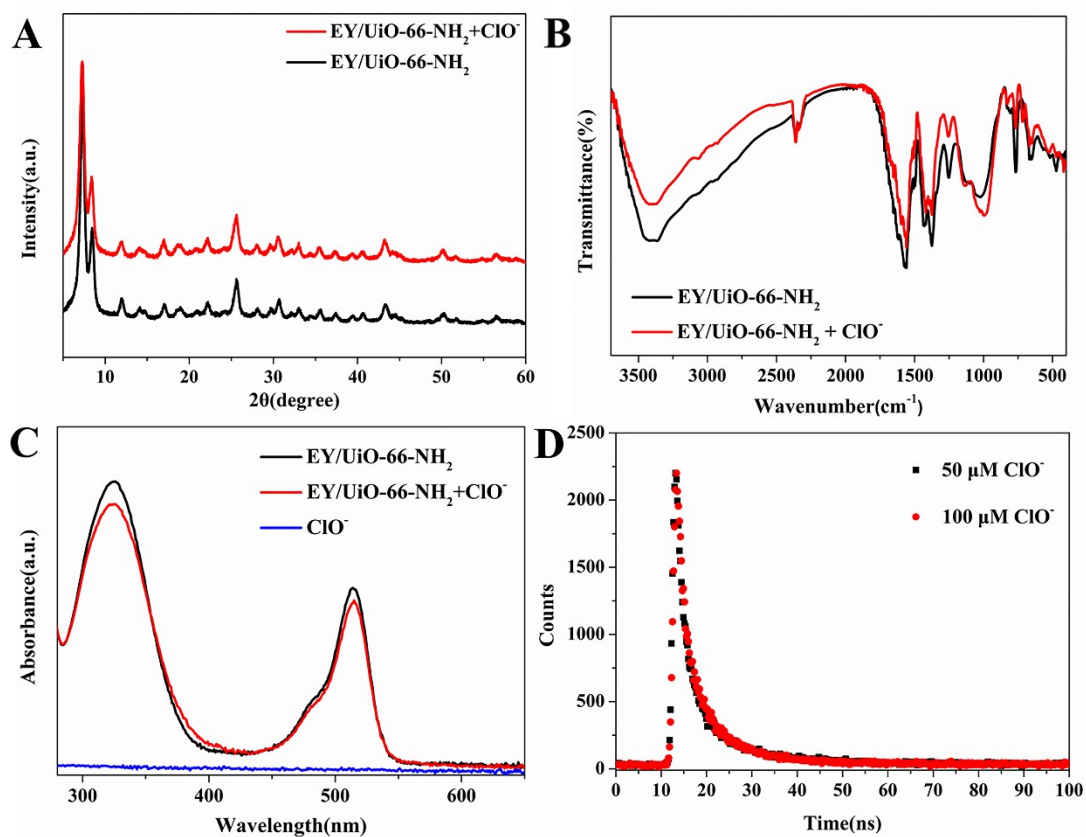

**Figure S6.** (A) PXRD images and (B) IR spectra and (C) UV/vis spectra and (D) time-resolved

fluorescence decays of EY/UiO-66-NH<sub>2</sub> in the presence and absence of 10<sup>-4</sup> mol/L ClO<sup>-</sup>.

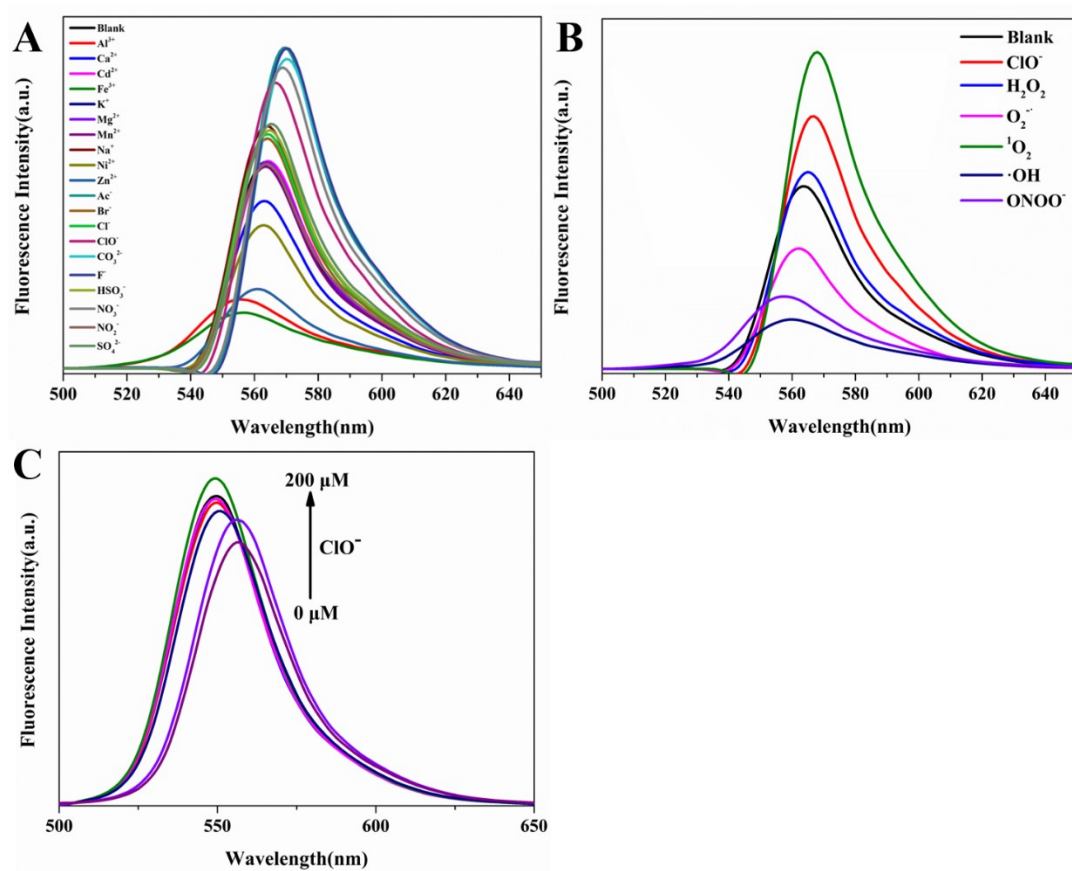

**Figure S7.** (A) Fluorescence response of EY (50 μg/mL) toward various ions (10 mM) and (B) toward various ROS species (50 μM (ClO<sup>-</sup>, O<sub>2</sub><sup>-</sup>, OH<sup>·</sup>, ONOO<sup>-</sup>), 50 mM H<sub>2</sub>O<sub>2</sub>, 5 mM O<sub>2</sub><sup>-</sup>). (C) Fluorescence response of EY toward various amount of ClO<sup>-</sup>. λ<sub>ex</sub>=467 nm, slit width, 1.5nm/3nm.

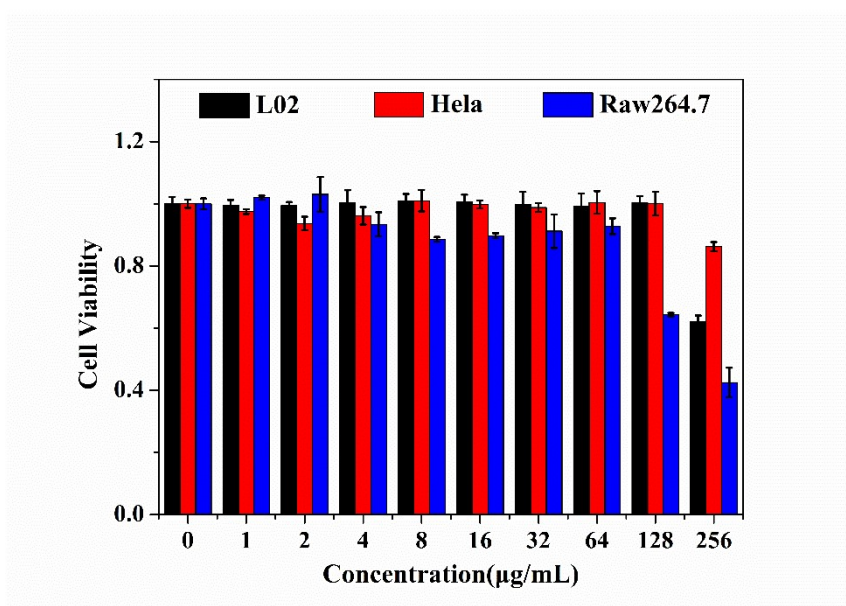

**Figure S8.** Viability of L02, HeLa and Raw264.7 cells after incubated with various concentrations of EY/UiO-66-NH<sub>2</sub> after 24 h.

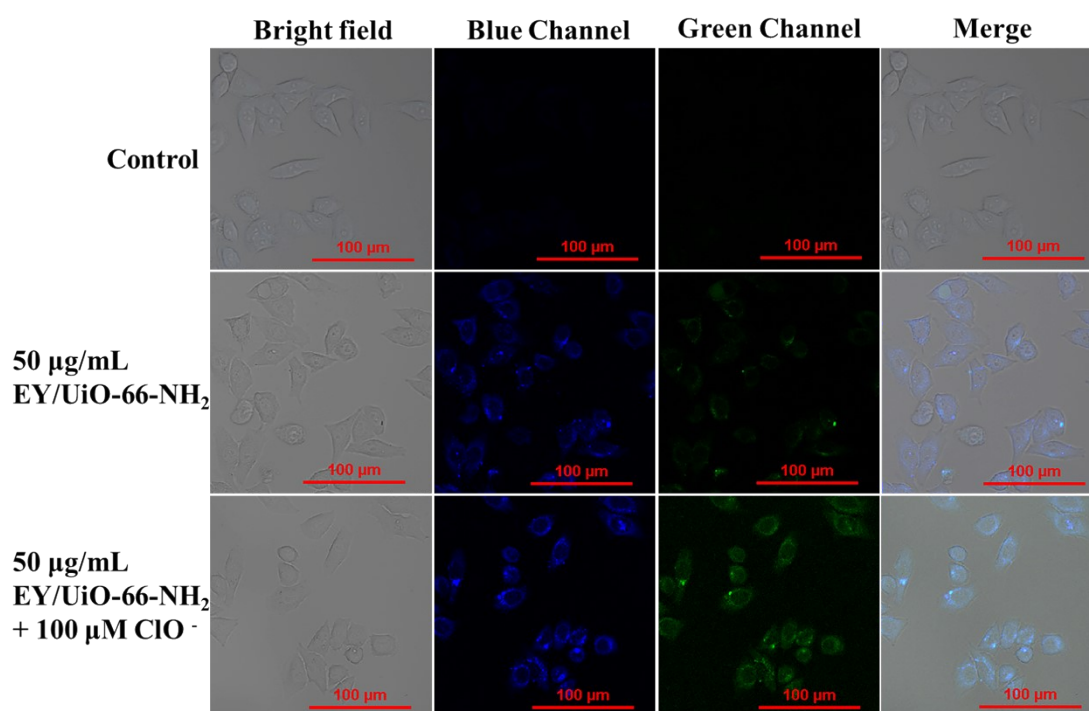

**Figure S9.** Confocal fluorescence imaging of exogenous ClO<sup>-</sup> in L02 cells. (A) Bioimaging of L02 cells without any treatment; (B) Bioimaging of L02 cells incubated with EY/UiO-66-NH<sub>2</sub> (50 µg/mL) for 5 hours at 37°C and (C) further incubated with 100 µM NaClO for 2h.



**Table S2.** Comparison of different sensors for hypochlorite sensing

| <b>Probe</b>                                                                   | <b>Output signal</b> | <b>Detection limit (nM)</b> | <b>Linear range (μM)</b> | <b>Ref</b> |
|--------------------------------------------------------------------------------|----------------------|-----------------------------|--------------------------|------------|
| UiO-68-ol                                                                      | OFF                  | 100                         | 0.1-100                  | 3          |
| {[Eu <sub>2</sub> Cu (IN) <sub>5</sub> (CO <sub>3</sub> ) (H <sub>2</sub> O)]} | OFF                  | 10000                       | 10-400                   | 4          |
| AF@MOF801                                                                      | OFF                  | 52                          | 0-7                      | 5          |
| UiO-68-PT                                                                      | ON                   | 280                         | 0-80                     | 6          |
| AuNCs@NMOF                                                                     | ON                   | 30                          | 0.08-1000                | 7          |
| CD/CCM@ZIF-8                                                                   | Ratiometric,<br>FRET | 67                          | 0.1-50                   | 8          |
| PDA/Eu/PDA-UiO-66-NH <sub>2</sub> (x)                                          | Ratiometric,<br>ON   | 100                         | 0.1-60                   | 9          |
| NH <sub>2</sub> -MIL-53(Al)                                                    | OFF                  | 40                          | 0.05-15                  | 10         |
| PDA-EuBBA-PEG-DBA-Fe <sub>3</sub> O <sub>4</sub> @ZIF-8                        | OFF                  | 0.133                       | 0-100                    | 11         |
| Hf-UiO-66-(NH <sub>2</sub> ) <sub>2</sub> MOF                                  | OFF                  | 9                           | 100-1000                 | 12         |
| NH <sub>2</sub> -Cu-MOF                                                        | OFF                  | 360                         | 0-12.5                   | 13         |
| UiO-66-NH <sub>2</sub>                                                         | Ratiometric,<br>ON   | 63.8                        | 0.1-150                  | 14         |
| EY/UiO-66-NH <sub>2</sub>                                                      | Ratiometric,<br>ON   | 46.4                        | 0.1-200                  | This work  |

## References

- 1 Y. J. Ma, G. H. Xu, F. D. Wei, Y. Cen, X. M. Xu, M. L. Shi, X. Cheng, Y. Y. Chai, M. Sohail, and Q. Hu, *ACS Appl. Mater. Interfaces*. 2018, **10**, 20801-20805.
- 2 P. F. Xing, K. Gao, B. Wang, J. Gao, H. Yan, J. Wen, W. S. Li, Y. Q. Xu, H. J. Li, J. X. Chen, W. Wang and S. G. Sun, 2016, **52**, 5064-5066.
- 3 Y. A. Li, S. Yang, Q. Y. Li, J. P. Ma, S. Zhang, Y. B. Dong, *Inorg. Chem.* 2017, **56**, 13241-13248.
- 4 H. Xu, C. S. Cao, J. Z. Xue, Y. Xu, B. Zhai, B. Zhao, *Chem.-Eur. J.* 2018, **24**, 10296.
- 5 Y. Ye, L. Zhao, S. Hu, A. Liang, Y. Li, Q. Zhuang, G. Tao, J. Gu, *Dalton Trans.* 2019, **48**, 2617- 2625.
- 6 Q. Y. Li, Y. A. Li, Q. Guan, W. Y. Li, X. J. Dong, Y. B. Dong, *Inorg. Chem.* 2019, **58**, 9890-9896.
- 7 X. Cao, S. Cheng, Y. You, S. Zhang, Y. Xian, *Anal. Chim. Acta.* 2019, **1092**, 108-116.
- 8 H. Tan, X. Wu, Y. Weng, Y. Lu, Z. Z. Huang, *Anal. Chem.* 2020, **92**, 3447-3454.
- 9 Y. N. Zeng, H. Q. Zheng, X. H. He, G. J. Cao, B. Wang, K. J. Wu, Z. J. Lin, *Dalton Trans.*, 2020, **49**, 9680-9688.
- 10 C. R. Li, J. Hai, S. L. Li, B. D. Wang, Z. Y. Yang, *Nanoscale*, 2018, **10**, 8667-8676.
- 11 T. Lu, L. Zhang, M. Sun, D. Deng, Y. Su and Y. Lv, *Anal. Chem.* 2016, **88**, 3413-3420.
- 12 S. Nandi, S. Biswas, *Microporous and Mesoporous Materials*. 2020, **299**, 110116.
- 13 P. P. Huo, Z. J. Li, C. B. Fan, S. Z. Pu, *New J. Chem.*, 2020, **44**, 19753.
- 14 F. F. Yu, T. Y. Du, Y. H. Wang, C. M. Li, Z. J. Qin, H. J. Jiang, X. M. Wang, *Sensors & Actuators: B. Chemical*. 2022, **353**, 131032.
